# Supplementary material
Source: publisher site journal article supplement (https://cdn.jamanetwork.com/ama/content_public/journal/ophth/939071/eoi220073supp1_prod_1673287577.02623.pdf)

## Supplemental Online Content

Mahmoudinezhad G, Moghimi S, Nishida T, et al. Association between rate of ganglion cell complex thinning and rate of central visual field loss. *JAMA Ophthalmol*. Published online November 23, 2022. doi:10.1001/jamaophthalmol.2022.4973

**eTable 1.** Factors Contributing to the Rate of Central Visual Field Mean Deviation Change Over Time by Univariable and Multivariable Mixed Model Analysis in POAG Eyes

**eTable 2.** Factors Contributing to the Rate of Central Visual Field Mean Deviation Change Over Time by Univariable and Multivariable Mixed Model Analysis in Glaucoma-Suspect Eyes

**eFigure.** Case Examples of Fast (A) and Slow (B) OCT Progressor Group

This supplemental material has been provided by the authors to give readers additional information about their work.

**eTable 1.** Factors Contributing to the Rate of Central Visual Field Mean Deviation Change Over Time by Univariable and Multivariable Mixed Model Analysis in POAG Eyes

| Variable                                     | Univariable Model      |            | Multivariable Model 1  |            |
|----------------------------------------------|------------------------|------------|------------------------|------------|
|                                              | $\beta$ , 95 % CI      | P value    | $\beta$ , 95 % CI      | P value    |
| Age, per 10 years older                      | -0.01<br>(-0.10, 0.08) | .80        | -0.00<br>(-0.10, 0.09) | .93        |
| Sex: Female                                  | -0.06<br>(-0.24, 0.12) | .54        | NA                     | NA         |
| Race: African American                       | 0.20<br>(0.00, 0.39)   | <b>.04</b> | 0.16<br>(-0.03, 0.35)  | .10        |
| Self-reported diabetes                       | -0.15<br>(-0.38, 0.08) | .19        | NA                     | NA         |
| Self-reported hypertension                   | -0.01<br>(-0.20, 0.17) | .88        | NA                     | NA         |
| Axial length, per 1mm longer                 | -0.03<br>(-0.11, 0.04) | .41        | NA                     | NA         |
| CCT, per 100 $\mu$ m thinner                 | 0.13<br>(-0.07, 0.34)  | .21        | NA                     | NA         |
| Baseline IOP, per 1 mmHg higher              | 0.00<br>(-0.02, 0.02)  | .94        | NA                     | NA         |
| Mean IOP during follow-up, per 1 mmHg higher | -0.02<br>(-0.05, 0.00) | .10        | -0.02<br>(-0.04, 0.01) | .12        |
| Baseline 10-2 VF MD, dB                      | 0.01<br>(-0.00, 0.03)  | .14        | NA                     | NA         |
| Follow-up period, per 1 year longer          | 0.04<br>(-0.04, 0.12)  | .32        | NA                     | NA         |
| No. of VF follow-up visits, per 1 visit      | -0.01<br>(-0.07, 0.05) | .74        | NA                     | NA         |
| <b>OCT macula progressor group</b>           |                        |            |                        |            |
| Fast - slow                                  | -0.28<br>(-0.52,-0.05) | <b>.02</b> | -0.24<br>(-0.48,-0.00) | <b>.05</b> |

CCT = central corneal thickness; IOP = intraocular pressure; MD = mean deviation; OCT= optical coherence tomography; VF = visual field; No=Number, POAG= Primary Open Angle Glaucoma. Values are shown in  $\beta$  coefficient (95% confidence interval).

**eTable 2.** Factors Contributing to the Rate of Central Visual Field Mean Deviation Change Over Time by Univariable and Multivariable Mixed Model Analysis in Glaucoma-Suspect Eyes

| Variable                                     | Univariable Model      |         | Multivariable Model 1  |         |
|----------------------------------------------|------------------------|---------|------------------------|---------|
|                                              | $\beta$ , 95 % CI      | P value | $\beta$ , 95 % CI      | P value |
| Age, per 10 years older                      | 0.04<br>(-0.07, 0.16)  | .47     | 0.06<br>(-0.07, 0.18)  | .37     |
| Sex: Female                                  | 0.22<br>(-0.05, 0.48)  | .10     | NA                     | NA      |
| Race: African American                       | 0.07<br>(-0.21, 0.35)  | .60     | NA                     | NA      |
| Self-reported diabetes                       | 0.17<br>(-0.25, 0.60)  | .43     | NA                     | NA      |
| Self-reported hypertension                   | -0.10<br>(-0.37, 0.17) | .46     | NA                     | NA      |
| Axial length, per 1mm longer                 | 0.10<br>(-0.02, 0.22)  | .12     | NA                     | NA      |
| CCT, per 100 $\mu$ m thinner                 | 0.08<br>(-0.25, 0.41)  | .65     | NA                     | NA      |
| Baseline IOP, per 1 mmHg higher              | -0.01<br>(-0.03, 0.02) | .72     | NA                     | NA      |
| Mean IOP during follow-up, per 1 mmHg higher | -0.01<br>(-0.05, 0.03) | .51     | 0.01<br>(-0.04, 0.06)  | .65     |
| Baseline 10-2 VF MD, dB                      | -0.04<br>(-0.13, 0.06) | .45     | NA                     | NA      |
| Follow-up period, per 1 year longer          | -0.01<br>(-0.11, 0.09) | .90     | NA                     | NA      |
| No. of VF follow-up visits, per 1 visit      | 0.02<br>(-0.07, 0.10)  | .71     | NA                     | NA      |
| <b>OCT macula progressor group</b>           |                        |         |                        |         |
| Fast - slow                                  | -0.26<br>(-0.55, 0.04) | .09     | -.30<br>(-0.63, -0.04) | .08     |

CCT = central corneal thickness; IOP = intraocular pressure; MD = mean deviation; OCT = optical coherence tomography; VF = visual field; No = Number. Values are shown in  $\beta$  coefficient (95% confidence interval).

**eFigure.** Case Examples of Fast (A) and Slow (B) OCT Progressor Group

The initial three OCTs used in the study are displayed, while representative 10-2 VF from the total follow-up period are presented. Respective dates are listed. (A) Testing from a 62-year-old white female. The estimated GCC change rate was  $-1.47 \mu\text{m}/\text{year}$  and estimated 10-2 VF MD rate of worsening was  $-1.02 \text{ dB}/\text{year}$ . Initial follow-up period for OCTs was 1 years, while total follow-up period for VFs was 2 years. (B) Testing from a 65-year-old white male. The estimated GCC change rate was  $-0.61 \mu\text{m}/\text{year}$  and estimated 10-2 VF MD rate of worsening was  $-0.28 \text{ dB}/\text{year}$ . Initial follow-up period for OCT was 1 year (GCC thinning are indicated by arrows), while total follow-up period for VF was 4.5 years. Abbreviations: dB = decibel; MD = mean deviation; GCC= ganglion cell complex, Optical Coherence Tomography=OCT, visual field =VF

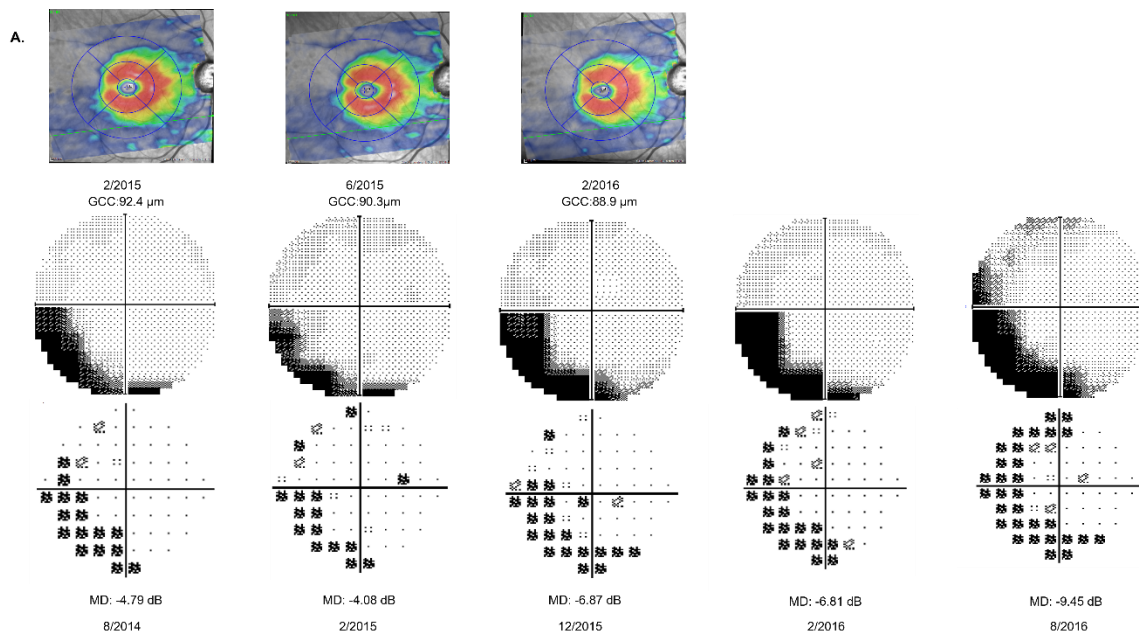

B.

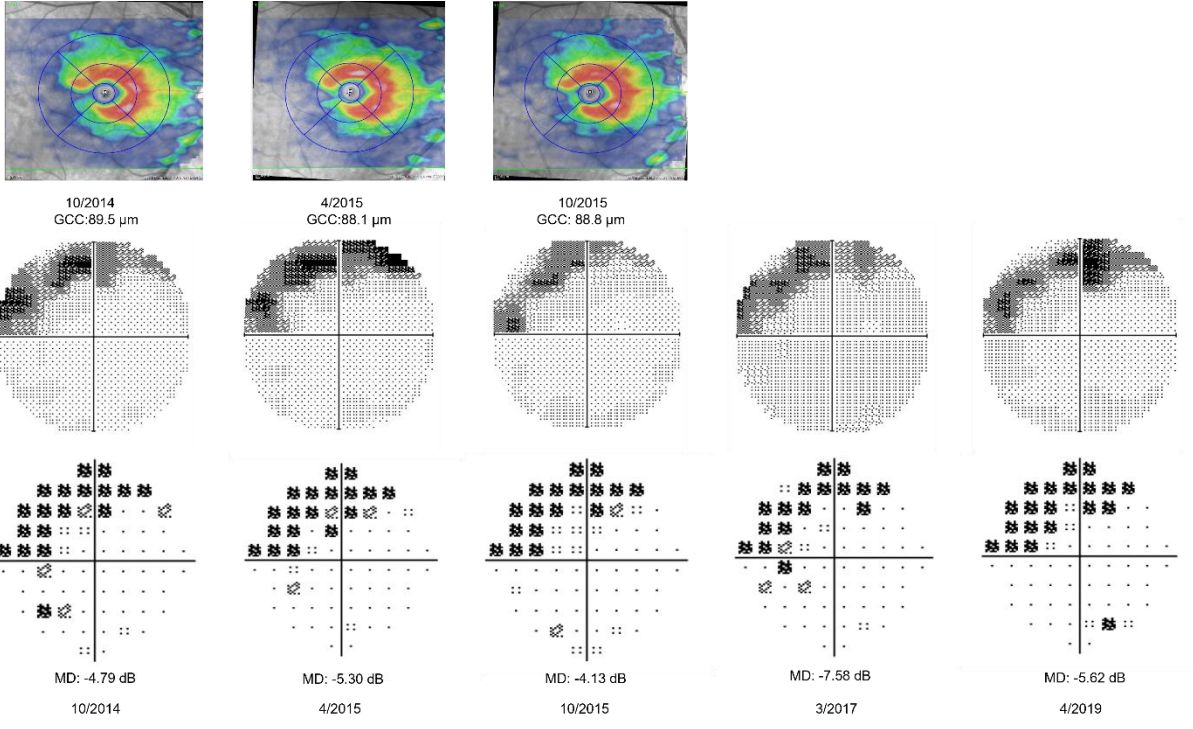

Supplement: Supplementary file 1 [file eoi220073supp1_prod_1673287577.02623.pdf]
